# Supplementary material for: Insight into winter haze formation mechanisms based on aerosol hygroscopicity and effective density measurements
Source: Copernicus journal article supplement (doi:10.5194/acp-17-7277-2017), 2017-06-16
Supplement: Supplementary file 1 [file acp-17-7277-2017-supplement.pdf]

Supplement of Atmos. Chem. Phys., 17, 7277–7290, 2017  
<https://doi.org/10.5194/acp-17-7277-2017-supplement>  
© Author(s) 2017. This work is distributed under  
the Creative Commons Attribution 3.0 License.

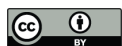

*Supplement of*

## **Insight into winter haze formation mechanisms based on aerosol hygroscopicity and effective density measurements**

**Yuanyuan Xie et al.**

*Correspondence to:* Xingnan Ye (yexingnan@fudan.edu.cn) and Jianmin Chen (jmchen@fudan.edu.cn)

The copyright of individual parts of the supplement might differ from the CC BY 3.0 License.

## **Supplementary Figures**

Figure S1 Meteorological conditions during the observation period.

Figure S2 Time series of concentrations of NO, NO<sub>2</sub>, SO<sub>2</sub>, and CO during the representative PM episode from 7 to 12 January.

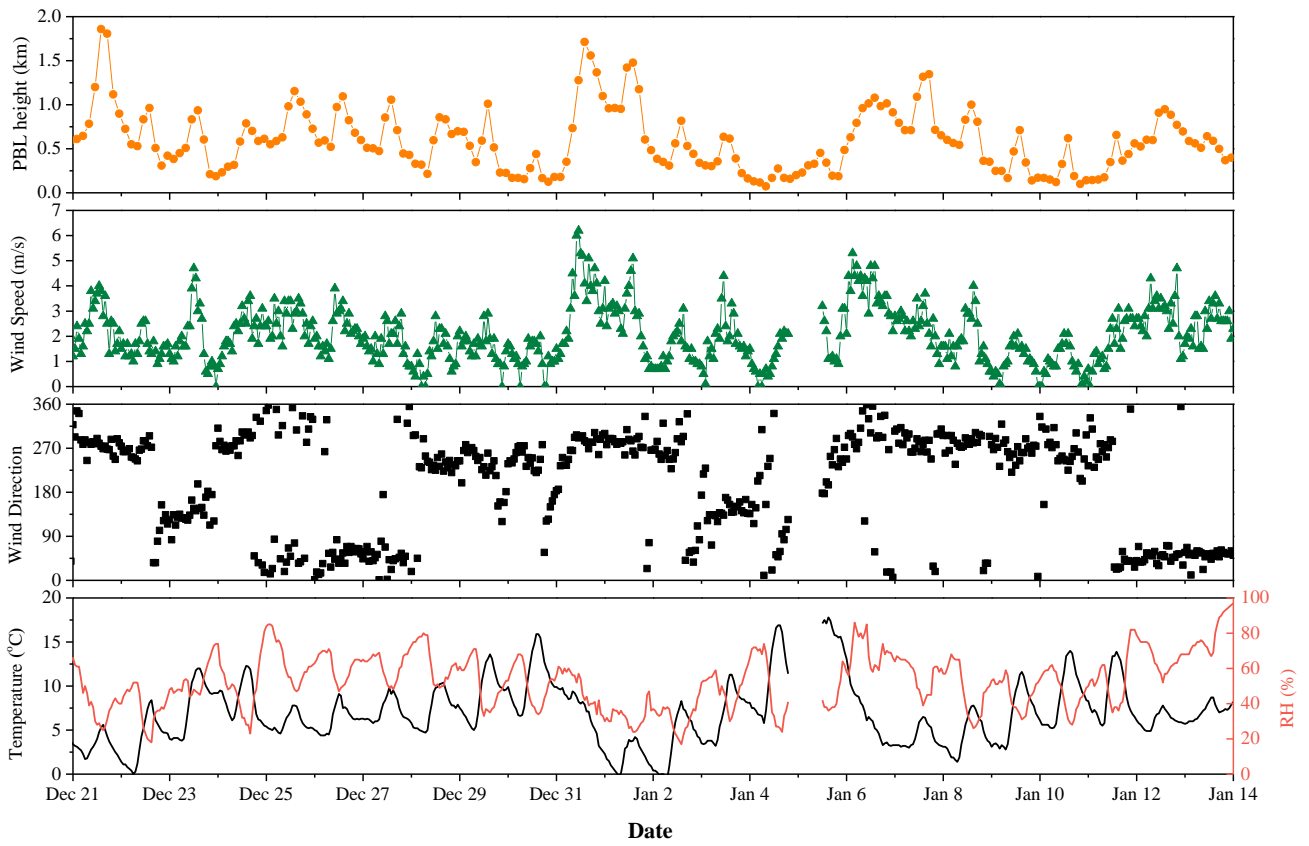

Figure S1 Meteorological conditions during the observation period.

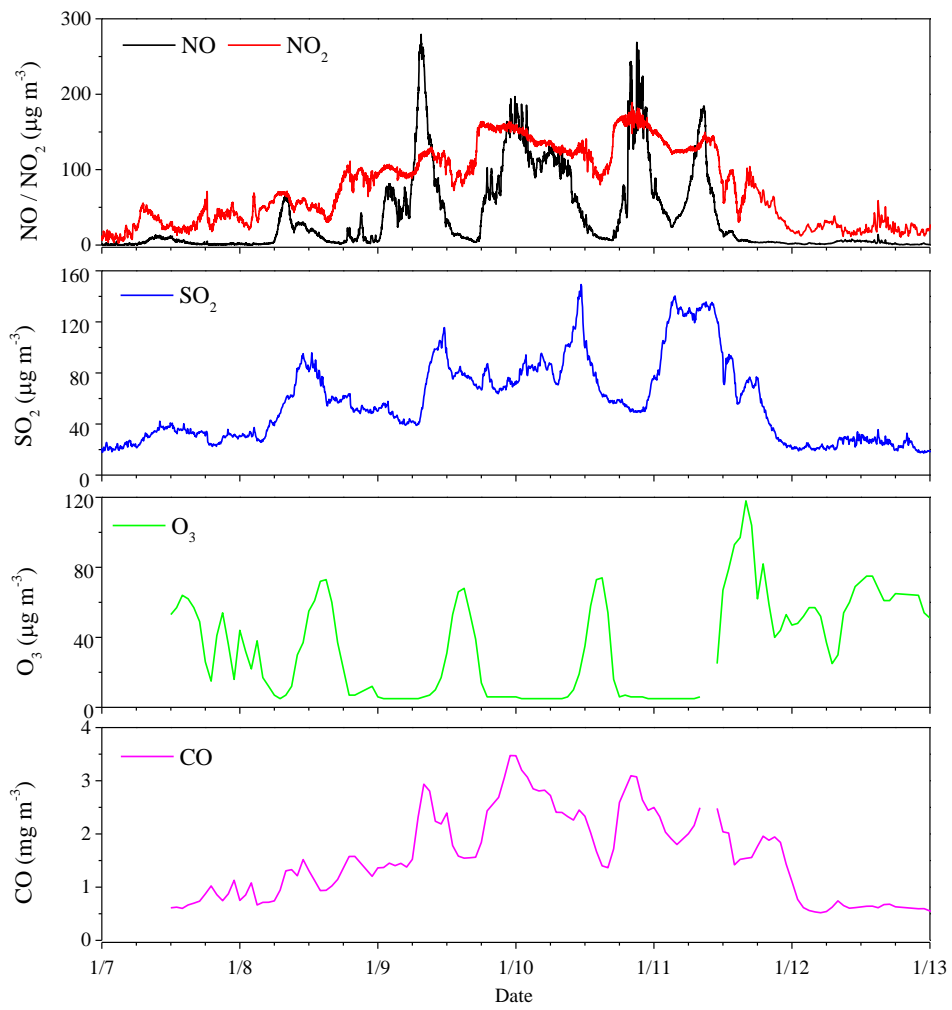

Figure S2 Time series of concentrations of NO, NO<sub>2</sub>, SO<sub>2</sub>, and CO during the representative PM episode from 7 to 12 January.
